# Supplementary material for: Temperature-dependence on the optical properties of chitosan carbon dots in the solid state
Source: Royal Society of Chemistry journal article supplement (doi:10.1039/d0ra07779h), 2021-01-01
Supplement: d0ra07779h1.pdf [file d0ra07779h1.pdf]

## **Temperature - Dependence on the optical properties of chitosan carbon dots in the solid state**

Artur F. Sonsin<sup>a\*</sup>, Sendy M. S. Nascimento<sup>a</sup>, Itiara Mayra B. Albuquerque<sup>a</sup>, Elaine C. O. Silva<sup>a</sup>, José Carlos A. Rocha<sup>a</sup>, Raissa S. Oliveira<sup>b</sup>, Cintya D' Angeles E. S. Barbosa<sup>b</sup>, Samuel T. Souza<sup>a</sup>, Eduardo J. S. Fonseca<sup>a\*</sup>

<sup>a</sup>Optics and Nanoscopy Group, Institute of Physics, Federal University of Alagoas (UFAL), 57072-970, Maceió, Alagoas, Brazil

<sup>b</sup>Institute of Chemistry and Biotechnology, Federal University of Alagoas (UFAL), 57072-970, Maceió, Alagoas, Brazil.

\*E-mail: [arturfalqueto\\_sonsin@hotmail.com](mailto:arturfalqueto_sonsin@hotmail.com); and [eduardo@fis.ufal.br](mailto:eduardo@fis.ufal.br)

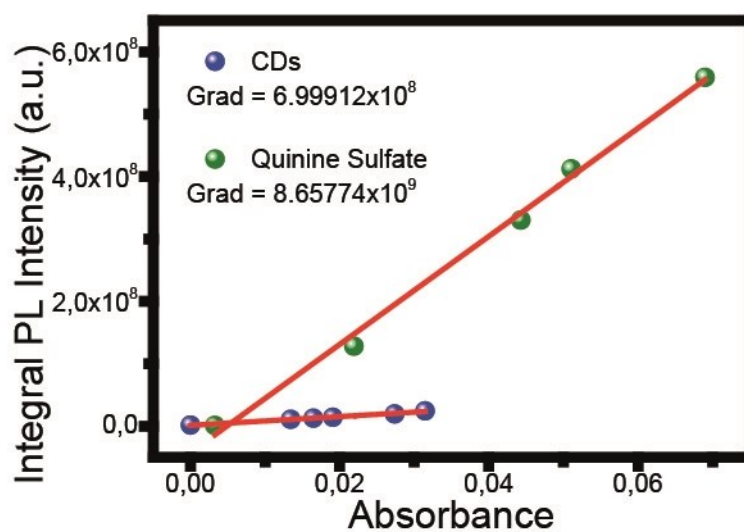

**Figure S1:** Plot of fluorescence intensities against their absorbances for CD and standard quinine sulfate.

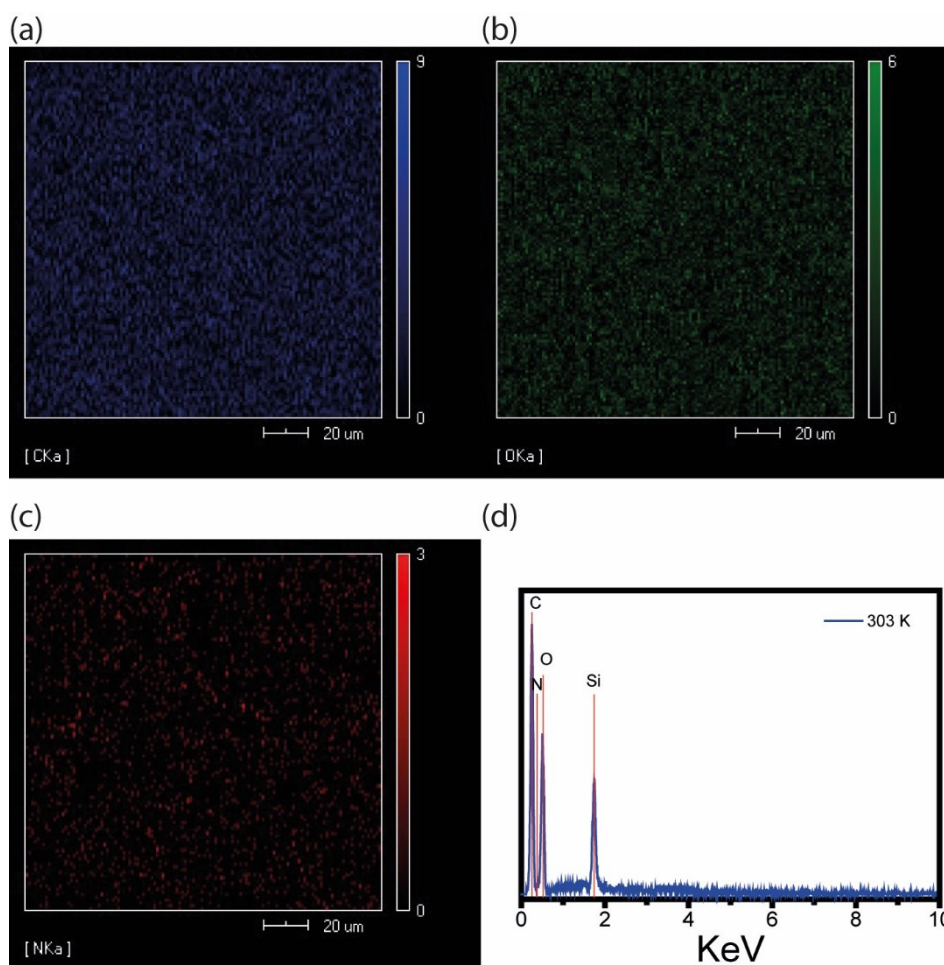

**Figure S2:** Elementary mapping of CDs corresponding to (a) carbon, (b) oxygen, and (c) nitrogen. (d) EDX spectrum of CDs at 303 K.

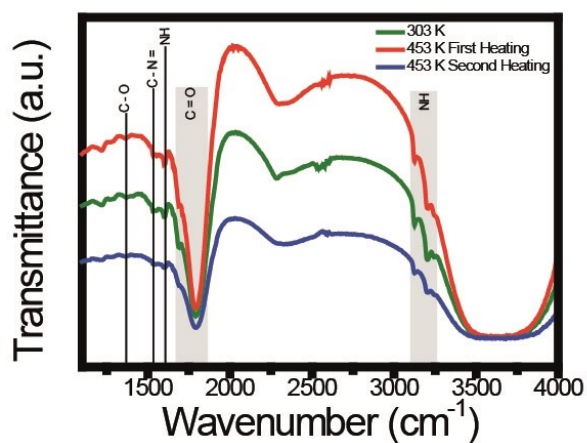

**Figure S3:** FTIR spectrum at 303 K (green line), after the first heating at 453 K (red line), and the second heating at 453 K (blue line).

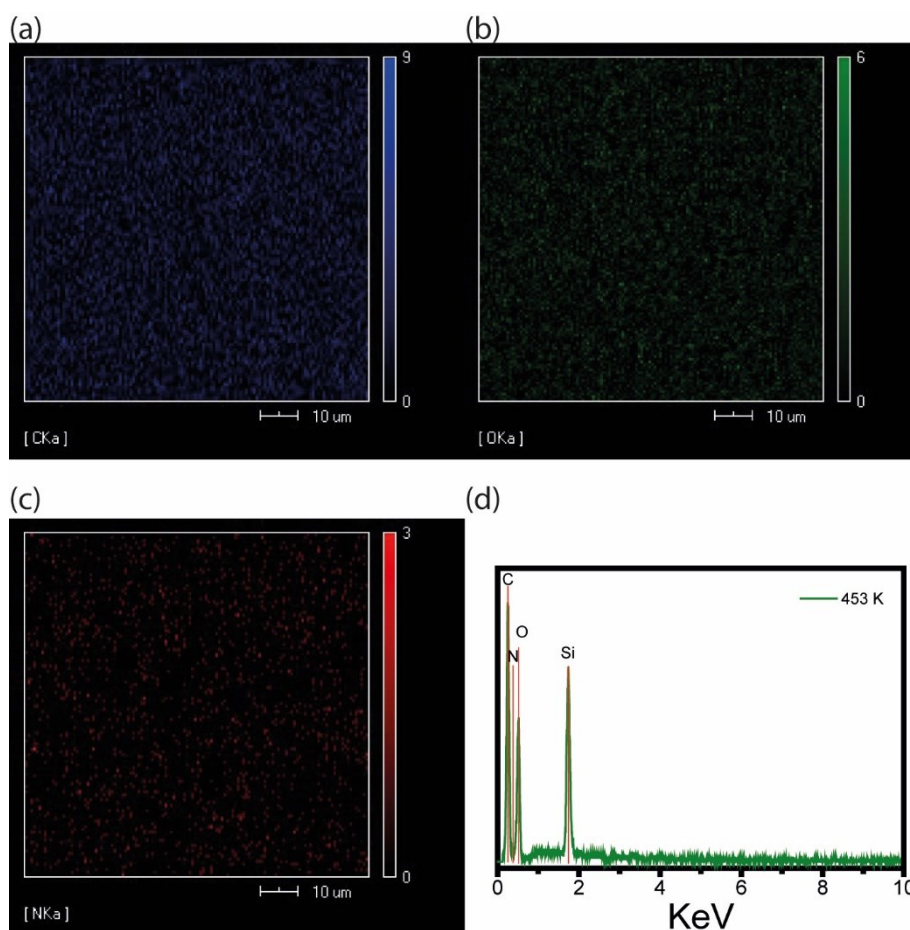

**Figure S4:** Elementary mapping of CDs corresponding to (a) carbon, (b) oxygen, and (c) nitrogen. (d) EDX spectrum of CDs at 453 K.
